# Supplementary material
Source: PubMed Central journal article supplement (PMC6093299)
Supplement: NIHMS963572-supplement-supplement_1.pdf [file NIHMS963572-supplement-supplement_1.pdf]

**eTable 1.** Count and percentage of total for missing baseline data.

| <i>Patient Characteristics</i>       | Missing count (%) |
|--------------------------------------|-------------------|
| Patient Age                          | 0 (0%)            |
| Female                               | 0 (0%)            |
| Body Mass Index (kg/m <sup>2</sup> ) | 9 (0.03%)         |
| Cerebrovascular Disease              | 82 (0.2%)         |
| Stroke                               | 1089 (3.3%)       |
| Chronic Lung Disease                 | 688 (2.1%)        |
| Hypertension                         | 10 (0.03%)        |
| Diabetes                             | 11 (0.03%)        |
| Peripheral Arterial Disease          | 46 (0.1%)         |
| Renal Failure (Hemodialysis)         | 21 (0.06%)        |
| NYHA Class                           | 507 (1.5%)        |
| Ejection Fraction (%)                | 711 (2.1%)        |
| Left Main Disease > 50%              | 9711 (29.1%)      |
| Number of Disease Vessels            | 115 (0.3%)        |
| Last Preoperative Hematocrit (%)     | 0 (0%)            |
| Predicted Risk of Mortality (%)      | 0 (0%)            |
| <i>Operative Characteristics</i>     |                   |
| Cardiopulmonary Bypass Support       | 1 (0.003%)        |
| Operative Status                     | 6 (0.02%)         |
| Cardiopulmonary Bypass Time (min)    | 73 (0.2%)         |
| Aortic Cross Clamp Time (min)        | 8 (0.02%)         |
| Lowest Intraoperative Hematocrit (%) | 12,181 (36.5%)    |
| Internal Mammary Artery (IMA) Use    | 25 (0.07%)        |

**eTable 2:** Count and percentage of total for missing outcomes data.

| Outcome                          | Missing count (%) |
|----------------------------------|-------------------|
| Intraoperative PRBC transfusion  | 18 (0.05%)        |
| Postoperative PRBC transfusion   | 7 (0.02%)         |
| Atrial Fibrillation              | 13 (0.04%)        |
| Stroke                           | 22 (0.07%)        |
| Cardiac Arrest                   | 15 (0.04%)        |
| Pneumonia                        | 42 (0.1%)         |
| Prolonged Mechanical Ventilation | 16 (0.05%)        |
| Renal Failure                    | 16 (0.05%)        |
| Hemodialysis                     | 20 (0.06%)        |
| Operative Mortality              | 34 (0.1%)         |
| In-hospital Mortality            | 0 (0%)            |

**eTable 3.** Intraoperative and postoperative transfusion frequencies.

| PRBC Units Transfused | Intraoperative | Postoperative | Total         |
|-----------------------|----------------|---------------|---------------|
| 0                     | 29090 (87.1%)  | 24729 (74.0%) | 22912 (68.6%) |
| 1                     | 1655 (5.0%)    | 3106 (9.3%)   | 2950 (8.8%)   |
| 2                     | 1759 (5.3%)    | 3004 (9.3%)   | 3457 (10.4%)  |
| 3                     | 437 (1.3%)     | 1013 (3.0%)   | 1442 (4.3%)   |
| 4+                    | 452 (1.4%)     | 1552 (4.7%)   | 2625 (7.9%)   |

PRBC = packed red blood cell

**eTable 4.** Risk-adjusted impact of preoperative hematocrit and packed red blood cell transfusion on postoperative mortality.

| Hematocrit Model | AOR  | 95% C.I.  | p-value |
|------------------|------|-----------|---------|
| Centered Hct     | 0.97 | 0.96-0.99 | 0.0001  |
| Logit(PROM)      | 2.64 | 2.46-2.83 | <0.0001 |
| Year             | 0.95 | 0.92-0.97 | 0.0001  |
| Intercept        | 0.93 | 0.70-1.24 | 0.637   |
| PRBC Model       | AOR  | 95% C.I.  | p-value |
| PRBC transfusion | 4.25 | 3.47-5.19 | <0.0001 |
| Logit(PROM)      | 2.22 | 2.07-2.39 | <0.0001 |
| Year             | 0.98 | 0.95-1.01 | 0.179   |
| Intercept        | 0.22 | 0.15-0.31 | <0.0001 |

Hct = hematocrit; PROM = predicted risk of mortality; PRBC = packed red blood cell; AOR = adjusted odds ratio; C.I. = confidence interval. Each model additionally accounts for hospital as a random effect.

**eTable 5.** Risk-adjusted impact of preoperative hematocrit and packed red blood cell transfusion on renal failure.

| Hematocrit Model  | AOR  | 95% C.I.  | p-value |
|-------------------|------|-----------|---------|
| Centered Hct      | 0.94 | 0.93-0.96 | <0.0001 |
| Logit(PRORF)      | 2.62 | 2.45-2.80 | <0.0001 |
| Year              | 0.89 | 0.87-0.92 | <0.0001 |
| Intercept         | 0.53 | 0.41-0.69 | <0.0001 |
| Transfusion Model | AOR  | 95% C.I.  | p-value |
| PRBC transfusion  | 6.29 | 5.24-7.56 | <0.0001 |
| Logit(PRORF)      | 2.30 | 2.16-2.46 | <0.0001 |
| Year              | 0.93 | 0.90-0.95 | <0.0001 |
| Intercept         | 0.13 | 0.10-0.18 | <0.0001 |

Hct = hematocrit; PRORF = predicted risk of renal failure; PRBC = packed red blood cell; AOR = adjusted odds ratio; C.I. = confidence interval. Each model additionally accounts for hospital as a random effect.

**eTable 6.** Risk-adjusted impact of preoperative hematocrit and packed red blood cell transfusion on stroke.

| <b>Hematocrit Model</b>  | <b>AOR</b> | <b>95% C.I.</b> | <b>p-value</b> |
|--------------------------|------------|-----------------|----------------|
| Centered Hct             | 1.02       | 1.00-1.04       | 0.062          |
| Logit(PROs)              | 2.60       | 2.26-2.98       | <0.0001        |
| Year                     | 0.94       | 0.90-0.97       | 0.0002         |
| Intercept                | 0.89       | 0.49-1.62       | 0.695          |
| <b>Transfusion Model</b> | <b>AOR</b> | <b>95% C.I.</b> | <b>p-value</b> |
| PRBC transfusion         | 2.35       | 1.90-2.92       | <0.0001        |
| Logit(PROs)              | 1.97       | 1.72-2.27       | <0.0001        |
| Year                     | 0.96       | 0.93-1.00       | 0.034          |
| Intercept                | 0.18       | 0.09-0.34       | <0.001         |

Hct = hematocrit; PROs = predicted risk of stroke; PRBC = packed red blood cell; AOR = adjusted odds ratio; C.I. = confidence interval. Each model additionally accounts for hospital as a random effect.
